# Supplementary material for: Comparative Genomics of Ralstonia solanacearum Identifies Candidate Genes Associated with Cool Virulence
Source: Front Plant Sci. 2017 Sep 13;8:1565. doi: 10.3389/fpls.2017.01565 (PMC5601409; doi:10.3389/fpls.2017.01565)
Supplement: Supplementary file 5 [file Table_5.XLSX]

## Sheet: SNP
Supplementary Table S5. Genome comparison 12 strains. List of genes with non-synonymous SNPs conserved in CV strains
P673	P797 (CFBP6783)	UW163	UW551	NCPPB909	23-10BR	CFBP2957	P597	P795(CIP120)	K-601	GMI1000	P799 (CFBP3059)	gene	Description
Cellular processes
RSP673_08280	RSP797_08225	UW163_RS14665	RRSL_04584	CQ06_22820	KR96_15845	RCFBP_11667	RSP597_07595	RSP795_07575	RSK60v3_1230004	RSc1710	RSP799_08070	tig	Trigger factor, ppiase
RSP673_05490	RSP797_05395	UW163_RS09890	RRSL_03524	CQ06_17100	KR96_19870	RCFBP_11156	RSP597_05165	RSP795_05205	RSK60v3_840011	RSc2236	RSP799_02420	valS	tRNA Valyl synthetase
RSP673_15310	RSP797_15735	UW163_RS03275	RRSL_02557	CQ06_16365	KR96_17840	RCFBP_21263	RSP597_14680	RSP795_14945	RSK60v3_2140006	RSc0224	RSP799_15055	rtcB	tRNA-splicing-ligase
RSP673_06150	RSP797_06060	UW163_RS10625	RRSL_03866	CQ06_17625	KR96_08700	RCFBP_11302	RSP597_05800	RSP795_05820	RSK60v3_920028	RSc2087	RSP799_05945		Rossman fold protein (DNA processing)
RSP673_11695	RSP797_11800	UW163_RS15900	RRSL_04467	CQ06_19020	KR96_02550	RCFBP_20534	RSP597_11000	RSP795_11130	RSK60v3_1580067	RSc0934	RSP799_08950	rimM	Ribosome Maturation Protein RimM domain
RSP673_03150	RSP797_03145	UW163_RS07625	RRSL_02669	CQ06_13695	KR96_09610	RCFBP_10673	RSP597_03005	RSP795_03110	RSK60v3_490016	RSc2788	RSP799_02860		Ribosomal protein L11 methyltransferase
RSP673_03195	RSP797_03190	UW163_RS07670	RRSL_02678	CQ06_13740	KR96_09565	RCFBP_10682	RSP597_03055	RSP795_03155	RSK60v3_500008	RSc2779	RSP799_02910		Exoribonuclease II
RSP673_02890	RSP797_02895	UW163_RS07375	RRSL_01997	CQ06_15125	KR96_09860	RCFBP_10621	RSP597_02740	RSP795_02860	RSK60v3_440036	RSc2839	RSP799_02600	ftsZ	cell-division. FtsZ-dependent cytokinesis
RSP673_02875	RSP797_02880	UW163_RS07360	RRSL_01994	CQ06_15110	KR96_09875	RCFBP_10618	RSP597_02725	RSP795_02845	RSK60v3_440033	RSc2842	RSP799_02585		D-alanine--D-alanine ligase
RSP673_20995	RSP797_21925	UW163_RS18950	RRSL_02285	CQ06_13345	KR96_19210	RCFBP_mp20138	RSP597_19700	RSP795_21085	RSK60v3_mp720002	RSp0700	RSP799_18950		Release Factor H-coupled TctB family protein
RSP673_12300	RSP797_12845	UW163_RS00360	RRSL_02374	CQ06_13050	KR96_06930	RCFBP_20624	RSP597_11465	RSP795_22445	RSK60v3_1680005	RSc0797	RSP799_12065	alaS	tRNA Alanyl-synthetase
RSP673_15870	RSP797_16290	UW163_RS03815	RRSL_02009	CQ06_16270	KR96_10435	RCFBP_21374	RSP597_15285	RSP795_15510	RSK60v3_90032	RSc0070	RSP799_15650		Peptide deformylase
RSP673_15860	RSP797_16280	UW163_RS03805	RRSL_02007	CQ06_16260	KR96_10445	RCFBP_21372	RSP597_15275	RSP795_15500	RSK60v3_90030	RSc0072	RSP799_15640		tRNA methionyl-formyltransferase
RSP673_15765	RSP797_16185	UW163_RS03710	RRSL_04374	CQ06_16160	KR96_10545	RCFBP_21353	RSP597_15175	RSP795_15400	RSK60v3_90010	RSc0090	RSP799_15545	tfoX	Transcriptional regulator of competence genes
RSP673_10325	RSP797_10460	UW163_RS12710	RRSL_02120	CQ06_03855	KR96_03255	RCFBP_20224	RSP597_09600	RSP795_09530	RSK60v3_1450006	RSc1209	RSP799_10285		23S rRNA m(5)U 1939 methyltransferase
RSP673_10290	RSP797_10425	UW163_RS12745	RRSL_02128	CQ06_03890	KR96_03290	RCFBP_20217	RSP597_09560	RSP795_09495	RSK60v3_1440037	RSc1216	RSP799_10320		tRNA Histidyl-synthetase
RSP673_04670	RSP797_04630	UW163_RS09120	RRSL_03601	CQ06_02945	KR96_05980	RCFBP_11011	RSP597_04545	RSP795_04565	RSK60v3_690020	RSc2415	RSP799_04340		Cytosol aminopeptidase
RSP673_02090	RSP797_02085	UW163_RS06555	RRSL_01858	CQ06_10585	KR96_16285	RCFBP_10457	RSP597_01930	RSP795_02335	RSK60v3_400031	RSc2993	RSP799_01700	rpoA	DNA-directed RNA polymerase alpha chain
RSP673_03260	RSP797_03250	UW163_RS07730	RRSL_02691	CQ06_13800	KR96_09505	RCFBP_10694	RSP597_03115	RSP795_03215	RSK60v3_500020	RSc2766	RSP799_02970		Guanyl-specific ribonuclease
RSP673_09795	RSP797_09920	UW163_RS13225	RRSL_00345	CQ06_05615	KR96_03820	RCFBP_20118	RSP597_09060	RSP795_09015	RSK60v3_1400035	RSc1308	RSP799_10795		Primosomal replication protein N
RSP673_07810	RSP797_07770	UW163_RS15105	RRSL_02599	CQ06_02215	KR96_20595	RCFBP_11572	RSP597_07155	RSP795_21325	RSK60v3_1100005	RSc1577	RSP799_07595	thrS	tRNA ligase threonine
RSP673_07835	RSP797_07795	UW163_RS15080	RRSL_02605	CQ06_02190	KR96_20570	RCFBP_11577	RSP597_07180	RSP795_21300	RSK60v3_1100010	RSc1582	RSP799_07620	pheT	tRNA phenylalanine synthetase beta chain
RSP673_09330	RSP797_09220	UW163_RS13675	RRSL_01329	CQ06_07230	KR96_04275	RCFBP_20035	RSP597_08640	RSP795_08605	RSK60v3_1380003	RSc1398	RSP799_11365		NAD-dependent DNA ligase
RSP673_09335	RSP797_09225	UW163_RS13670	RRSL_01330	CQ06_07225	KR96_04270	RCFBP_20036	RSP597_08645	RSP795_08610	RSK60v3_1380004	RSc1397	RSP799_11360		Cell division FtsZ domain
RSP673_05070	RSP797_05020	UW163_RS09510	RRSL_00963	CQ06_02600	KR96_05630	RCFBP_11091	RSP597_04925	RSP795_04950	RSK60v3_760017	RSc2341	RSP799_04775	ftsK	cell-division. FtsK-dependent cytokinesis
RSP673_13380	RSP797_13900	UW163_RS01405	RRSL_04100	CQ06_18360	KR96_14695	RCFBP_20897	RSP597_12670	RSP795_13470	RSK60v3_1830001	RSc0577	RSP799_13220		translation factor Sua5
RSP673_06785	RSP797_06665	UW163_RS11230	RRSL_01683	CQ06_23305	KR96_09320	RCFBP_11421	RSP597_06395	RSP795_06415	RSK60v3_970023	RSc1964	RSP799_06550	tolQ	TolQ protein involved in mantaining integrity of membrane (TolC-Pal system)
RSP673_10490	RSP797_10650	UW163_RS12525	RRSL_00145	CQ06_14445	KR96_21360	RCFBP_20256	RSP597_09815	RSP795_09725	RSK60v3_1470001	RSc1177	RSP799_10075		Peptidase P60. Cell wall associated hydrolase NipC family
RSP673_10480	RSP797_10640	UW163_RS12535	RRSL_00147	CQ06_14455	KR96_21350	RCFBP_20254	RSP597_09795	RSP795_09715	RSK60v3_1460013	RSc1179	RSP799_10085		tRNA Glutamyl-synthetase
RSP673_07905	RSP797_07865	UW163_RS15010	RRSL_04519	CQ06_14215	KR96_20500	RCFBP_11600	RSP597_07240	RSP795_21235	RSK60v3_1140011	RSc1593	RSP799_07725		Exodeoxyribonuclease III
RSP673_01880	RSP797_01860	UW163_RS06355	RRSL_00877	CQ06_09095	KR96_23570	RCFBP_10415	RSP597_00990	RSP795_01740	RSK60v3_380009	RSc3034	RSP799_01495		DNA-directed RNA polymerase beta chain
RSP673_02580	RSP797_02560	UW163_RS07040	RRSL_02737	CQ06_10125	KR96_19645	RCFBP_10555	RSP597_02400	RSP795_02000	RSK60v3_420026	RSc2901	RSP799_02180		Bacterial Peptide Chain Release Factor 1 (RF-1)
RSP673_05730	RSP797_05630	UW163_RS10125	RRSL_03477	CQ06_16865	KR96_24525	RCFBP_11205	RSP597_05400	RSP795_05435	RSK60v3_860031	RSc2191	RSP799_05510	purD	Phosphoribosylamine--glycine ligase
RSP673_05655	RSP797_05555	UW163_RS10050	RRSL_03491	CQ06_16935	KR96_20060	RCFBP_11190	RSP597_05325	RSP795_05365	RSK60v3_860017	RSc2205	RSP799_05440		DNA polymerase III alpha subunit
RSP673_04440	RSP797_04395	UW163_RS08890	RRSL_03838	CQ06_23435	KR96_18945	RCFBP_10967	RSP597_04315	RSP795_04340	RSK60v3_670037	RSc2458	RSP799_04115	ileS	tRNA isoleucyl synthetase
RSP673_02845	RSP797_02850	UW163_RS07330	RRSL_01988	CQ06_15080	KR96_09905	RCFBP_10612	RSP597_02695	RSP795_02815	RSK60v3_440027	RSc2848	RSP799_02555		UDP-N-acetylmuramoylalanyl-D-glutamyl-2, 6-diaminopimelate--D-alanyl-D-alanyl ligase
Metabolic process
RSP673_10465	RSP797_10600	UW163_RS12575	RRSL_00293	CQ06_14495	KR96_03120	RCFBP_20252	RSP597_09755	RSP795_09675	RSK60v3_1460011	RSc1181	RSP799_10125		UDP phosphate-alpha-4-amino-4-deoxy-L-arabinose arabinosyl transferase
RSP673_08350	RSP797_08295	UW163_RS14595	RRSL_01314	CQ06_22890	KR96_15775	RCFBP_11680	RSP597_07665	RSP795_07645	RSK60v3_1230017	RSc1722	RSP799_08150	purL	Phosphoribosylformylglycinamidine synthase
RSP673_08315	RSP797_08260	UW163_RS14630	RRSL_04589	CQ06_22855	KR96_15810	RCFBP_11673	RSP597_07630	RSP795_07610	RSK60v3_1230010	RSc1715	RSP799_08105	ppiD	Peptidyl-prolyl cis-trans isomerase
RSP673_02775	RSP797_02780	UW163_RS07260	RRSL_01973	CQ06_15010	KR96_09975	RCFBP_10597	RSP597_02615	RSP795_02745	RSK60v3_440013	RSc2862	RSP799_02485		1-phosphofructokinase
RSP673_05565	RSP797_05470	UW163_RS09965	RRSL_03510	CQ06_17025	KR96_19945	RCFBP_11173	RSP597_05240	RSP795_05280	RSK60v3_850006	RSc2221	RSP799_05355		1-deoxy-D-xylulose 5-phosphate synthase
RSP673_14695	RSP797_15185	UW163_RS02690	RRSL_03310	CQ06_11785	KR96_17965	RCFBP_21136	RSP597_13885	RSP795_14655	RSK60v3_2040041	RSc0351	RSP799_14400	moeB	Molybdopterin biosynthesis protein
RSP673_11115	RSP797_11290	UW163_RS11885	RRSL_01168	CQ06_09300	KR96_02040	RCFBP_20428	RSP597_10410	RSP795_10565	RSK60v3_1530026	RSc1050	RSP799_09470		3-oxoacyl-[acyl-carrier-protein] synthase III
RSP673_14215	RSP797_14705	UW163_RS02225	RRSL_03775	CQ06_19290	KR96_24265	RCFBP_21042	RSP597_13405	RSP795_14190	RSK60v3_1930002	RSc0442	RSP799_13940		Long-chain-fatty-acid--CoA ligase
RSP673_14265	RSP797_14755	UW163_RS02275	RRSL_03764	CQ06_19340	KR96_24215	RCFBP_21052	RSP597_13460	RSP795_14240	RSK60v3_1940002	RSc0432	RSP799_13990		AMP-(fatty)acid ligases
RSP673_14270	RSP797_14760	UW163_RS02280	RRSL_03763	CQ06_19345	KR96_24210	RCFBP_21053	RSP597_13465	RSP795_14245	RSK60v3_1940003	RSc0431	RSP799_13995		Lipid A biosynthesis acetyltransferase
RSP673_03720	RSP797_03720	UW163_RS08185	RRSL_03210	CQ06_08745	KR96_12660	RCFBP_10791	RSP597_03635	RSP795_03695	RSK60v3_560001	RSc2656	RSP799_03445		Glutamate-ammonia-ligase adenylyltransferase
RSP673_11180	RSP797_11355	UW163_RS11820	RRSL_01181	CQ06_09235	KR96_02105	RCFBP_20443	RSP597_10475	RSP795_10630	RSK60v3_1530041	RSc1037	RSP799_09400	moeA	Molybdopterin biosynthesis protein
RSP673_11210	RSP797_11385	UW163_RS11790	RRSL_01188	CQ06_09205	KR96_02135	RCFBP_20449	RSP597_10505	RSP795_10660	RSK60v3_1530047	RSc1031	RSP799_09370		Nicotinate phosphoribosyltransferase
RSP673_11300	RSP797_11475	UW163_RS11700	RRSL_04392	CQ06_18720	KR96_02225	RCFBP_20467	RSP597_10605	RSP795_10755	RSK60v3_1570003	RSc1013	RSP799_09270		Ribokinase
RSP673_11735	RSP797_11840	UW163_RS15940	RRSL_04475	CQ06_18980	KR96_02590	RCFBP_20555	RSP597_11075	RSP795_11185	RSK60v3_1580074	RSc0926	RSP799_08910		D-amino acid dehydrogenase small subunit
RSP673_08515	RSP797_08460	UW163_RS14430	RRSL_01599	CQ06_13615	KR96_21785	RCFBP_11770	RSP597_07835	RSP795_07810	RSK60v3_1250021	RSc1761	RSP799_08315		3-ketoacyl-CoA thiolase
RSP673_14980	RSP797_15450	UW163_RS02950	RRSL_01647	CQ06_00770	KR96_20215	RCFBP_21193	RSP597_14165	RSP795_16235	RSK60v3_2070014	RSc0298	RSP799_14670		3-oxoadipate enol-lactonase
RSP673_14035	RSP797_14520	UW163_RS02055	RRSL_03808	CQ06_15415	KR96_16980	RCFBP_21008	RSP597_13230	RSP795_14010	RSK60v3_1910021	RSc0476	RSP799_13770		Enoyl-hydratase
RSP673_13975	RSP797_14460	UW163_RS01995	RRSL_03820	CQ06_15475	KR96_16920	RCFBP_20995	RSP597_13165	RSP795_13950	RSK60v3_1910008	RSc0487	RSP799_13705		Dihydroorotase
RSP673_13880	RSP797_14370	UW163_RS01900	RRSL_00994	CQ06_15565	KR96_16830	RCFBP_20977	RSP597_13075	RSP795_13860	RSK60v3_1900007	RSc0504	RSP799_13620	purH	phosphoribosylaminoimidazolecarboxamide formyltransferase
RSP673_20975	RSP797_21905	UW163_RS18930	RRSL_02281	CQ06_13365	KR96_19190	RCFBP_mp20134	RSP597_19680	RSP795_21105	RSK60v3_mp720006	RSp0690	RSP799_18900		Fumarylacetoacetase
RSP673_20920	RSP797_21850	UW163_RS18875	RRSL_02272	CQ06_13420	KR96_19135	RCFBP_mp20121	RSP597_19630	RSP795_21155	RSK60v3_mp730010	RSp0680	RSP799_18850	trpC2	Indole-3-glycerol phosphate synthase
RSP673_20785	RSP797_21715	UW163_RS18745	RRSL_02243	CQ06_04585	KR96_23085	RCFBP_mp20091	RSP597_19465	RSP795_23485	RSK60v3_mp750038	RSp0646	RSP799_18675		1-aminocyclopropane-1-carboxylate deaminase
RSP673_15850	RSP797_16270	UW163_RS03795	RRSL_02005	CQ06_16250	KR96_10455	RCFBP_21370	RSP597_15265	RSP795_15490	RSK60v3_90028	RSc0074	RSP799_15630	htpX	Protease
RSP673_15730	RSP797_16150	UW163_RS03675	RRSL_04367	CQ06_16125	KR96_10580	RCFBP_21346	RSP597_15140	RSP795_15365	RSK60v3_90003	RSc0100	RSP799_15510		phosphomethylpyrimidine kinase / hydroxymethylpyrimidine kinase
RSP673_02230	RSP797_02230	UW163_RS06700	RRSL_01888	CQ06_10445	KR96_16425	RCFBP_10485	RSP597_02070	RSP795_02475	RSK60v3_410012	RSc2965	RSP799_01845	gltB	Glutamate synthase [NADPH] large chain
RSP673_11345	RSP797_11520	UW163_RS11650	RRSL_04400	CQ06_18675	KR96_02270	RCFBP_20477	RSP597_10650	RSP795_10800	RSK60v3_1580011	RSc1003	RSP799_09225		Carboxypeptidase S1
RSP673_16270	RSP797_19725	UW163_RS16485	RRSL_00617	CQ06_14600	KR96_12115	RCFBP_mp10008	RSP597_16175	RSP795_24195	RSK60v3_mp90048	RSp0007	RSP799_22830	kgtP2	alpha-ketoglutarate permease, kgtP2
RSP673_10265	RSP797_10400	UW163_RS12770	RRSL_02133	CQ06_03915	KR96_03315	RCFBP_20212	RSP597_09535	RSP795_09470	RSK60v3_1440032	RSc1221	RSP799_10345	hflX	GTP_binding protein
RSP673_10260	RSP797_10395	UW163_RS12775	RRSL_02134	CQ06_03920	KR96_03320	RCFBP_20211	RSP597_09530	RSP795_09465	RSK60v3_1440031	RSc1222	RSP799_10350	hflK	Protease activity modulator HflK
RSP673_10235	RSP797_10370	UW163_RS12800	RRSL_02139	CQ06_03945	KR96_03345	RCFBP_20206	RSP597_09505	RSP795_09440	RSK60v3_1440026	RSc1227	RSP799_10375		phosphoribosyltransferase
RSP673_04650	RSP797_04610	UW163_RS09100	RRSL_03597	CQ06_02965	KR96_06000	RCFBP_11007	RSP597_04525	RSP795_04545	RSK60v3_690016	RSc2419	RSP799_04320		5-carboxymethyl-2-hydroxymuconate delta-isomerase
RSP673_14470	RSP797_14965	UW163_RS02470	RRSL_03728	CQ06_11560	KR96_18190	RCFBP_21092	RSP597_13665	RSP795_14435	RSK60v3_2030019	RSc0396	RSP799_14175		4-(cytidine 5 -diphospho)-2-C-methyl-D-erythritol kinase
RSP673_20065	RSP797_20960	UW163_RS20945	RRSL_04690	CQ06_07580	KR96_04330	RCFBP_mp30006	RSP597_22270	RSP795_18890	RSK60v3_mp320014	RSp1185	RSP799_21060		D-serine dehydratase
RSP673_22575	RSP797_23510	UW163_RS20425	RRSL_03368	CQ06_14055	KR96_08130	RCFBP_mp20546	RSP597_21670	RSP795_16575	RSK60v3_mp360016	RSp1059	RSP799_20090		D-beta-hydroxybutyrate dehydrogenase
RSP673_03250	RSP797_03240	UW163_RS07720	RRSL_02688	CQ06_13790	KR96_09515	RCFBP_10692	RSP597_03105	RSP795_03205	RSK60v3_500018	RSc2768	RSP799_02960		Thiamine-monophosphate kinase
RSP673_07995	RSP797_07960	UW163_RS14930	RRSL_04534	CQ06_22555	KR96_16105	RCFBP_11616	RSP597_07325	RSP795_07030	RSK60v3_1190010	RSc1609	RSP799_07810		D-alanyl-D-alanine-carboxypeptidase
RSP673_12385	RSP797_12925	UW163_RS00440	RRSL_01525	CQ06_13130	KR96_06850	RCFBP_20639	RSP597_11545	RSP795_12480	RSK60v3_1690002	RSc0780	RSP799_12150		Long-chain-fatty-acid--CoA ligase
RSP673_07865	RSP797_07825	UW163_RS15050	RRSL_04511	CQ06_14175	KR96_20540	RCFBP_11591	RSP597_07200	RSP795_21275	RSK60v3_1140003	RSc1585	RSP799_07685		Aldose epimerase
RSP673_09995	RSP797_10120	UW163_RS13040	RRSL_01408	CQ06_05815	KR96_03585	RCFBP_20159	RSP597_09260	RSP795_09210	RSK60v3_1420002	RSc1269	RSP799_10600		2-oxoglutarate dehydrogenase E1 component
RSP673_09410	RSP797_09305	UW163_RS13595	RRSL_01345	CQ06_07150	KR96_04195	RCFBP_20048	RSP597_08705	RSP795_08670	RSK60v3_1380016	RSc1384	RSP799_11280		D-aminopeptidase
RSP673_11485	RSP797_11660	UW163_RS15760	RRSL_04425	CQ06_19220	KR96_02405	RCFBP_20504	RSP597_10780	RSP795_10930	RSK60v3_1580035	RSc0977	RSP799_09090		Soluble lytic murein transglycosylase
RSP673_07290	RSP797_07480	UW163_RS15430	RRSL_02174	CQ06_22350	KR96_13945	RCFBP_11514	RSP597_06845	RSP795_06870	RSK60v3_1030041	RSc1535	RSP799_07375		Phosphate regulon sensor protein phoR
RSP673_12845	RSP797_13380	UW163_RS00895	RRSL_04256	CQ06_11950	KR96_06380	RCFBP_20728	RSP597_12005	RSP795_12925	RSK60v3_1720079	RSc0687	RSP799_12625		dTDP-rhamnosyl transferase
RSP673_12815	RSP797_13350	UW163_RS00865	RRSL_04251	CQ06_11975	KR96_06400	RCFBP_20722	RSP597_11975	RSP795_12900	RSK60v3_1720073	RSc0692	RSP799_12595		Lipopolysaccharide heptosyltransferase-1
RSP673_12810	RSP797_13345	UW163_RS00860	RRSL_04250	CQ06_11980	KR96_06405	RCFBP_20721	RSP597_11970	RSP795_12895	RSK60v3_1720072	RSc0693	RSP799_12590		3-deoxy-D-manno-octulosonic-acid transferase
RSP673_05025	RSP797_04975	UW163_RS09465	RRSL_00971	CQ06_02640	KR96_05675	RCFBP_11082	RSP597_04880	RSP795_04905	RSK60v3_760008	RSc2349	RSP799_04730	ppa	Inorganic pyrophosphatase
RSP673_06645	RSP797_06530	UW163_RS11100	RRSL_02493	CQ06_06775	KR96_09185	RCFBP_11394	RSP597_06260	RSP795_06285	RSK60v3_960010	RSc1991	RSP799_06410	gltA	Citrate synthase
RSP673_06660	RSP797_06545	UW163_RS11115	RRSL_02496	CQ06_06790	KR96_09200	RCFBP_11397	RSP597_06275	RSP795_06300	RSK60v3_960013	RSc1988	RSP799_06425	leuB1	3-isopropylmalate dehydrogenase
RSP673_06670	RSP797_06550	UW163_RS11120	RRSL_02497	CQ06_06800	KR96_09210	RCFBP_11399	RSP597_06280	RSP795_06305	RSK60v3_960015	RSc1987	RSP799_06430	asd	Aspartate-semialdehyde dehydrogenase
RSP673_15985	RSP797_16400	UW163_RS03920	RRSL_02031	CQ06_19995	KR96_10330	RCFBP_21396	RSP597_15435	RSP795_15620	RSK60v3_130001	RSc0049	RSP799_15760		Possible 3-carboxymuconate cyclase. Biosynthesis of cofactors, NAD biosynthesis
RSP673_16115	RSP797_16525	UW163_RS04045	RRSL_02960	CQ06_01665	KR96_10210	RCFBP_21418	RSP597_15545	RSP795_15750	RSK60v3_140006	RSc0027	RSP799_15830		Homoserine O-acetyltransferase
RSP673_16170	RSP797_16580	UW163_RS04100	RRSL_02948	CQ06_01720	KR96_10155	RCFBP_21430	RSP597_15600	RSP795_15805	RSK60v3_150004	RSc0017	RSP799_15985	pcKA	phosphoenolpyruvate carboxykinase (GTP)
RSP673_22860	RSP797_23825	UW163_RS17630	RRSL_02308	CQ06_16595	KR96_13425	RCFBP_mp10423	RSP597_18115	RSP795_11655	RSK60v3_mp930002	RSp0396	RSP799_17790		Thiosulfate sulfurtransferase
RSP673_13385	RSP797_13905	UW163_RS01410	RRSL_04101	CQ06_18365	KR96_14690	RCFBP_20898	RSP597_12675	RSP795_13475	RSK60v3_1830002	RSc0576	RSP799_13225	purK	phosphoribosylaminoimidazole carboxylase
RSP673_13390	RSP797_13910	UW163_RS01415	RRSL_04102	CQ06_18370	KR96_14685	RCFBP_20899	RSP597_12680	RSP795_13480	RSK60v3_1830003	RSc0575	RSP799_13230		N5-carboxyaminoimidazole ribonucleotide mutase
RSP673_14640	RSP797_15130	UW163_RS02635	RRSL_03299	CQ06_11730	KR96_18020	RCFBP_21125	RSP597_13830	RSP795_14600	RSK60v3_2040030	RSc0362	RSP799_14345		Cytochrome c oxidase polypeptide II
RSP673_14650	RSP797_15140	UW163_RS02645	RRSL_03302	CQ06_11740	KR96_18010	RCFBP_21127	RSP597_13840	RSP795_14610	RSK60v3_2040032	RSc0360	RSP799_14355		SAM-dependent methyltransferase
RSP673_13405	RSP797_13925	UW163_RS01430	RRSL_04105	CQ06_18385	KR96_14670	RCFBP_20902	RSP597_12695	RSP795_13495	RSK60v3_1830006	RSc0572	RSP799_13245		Pyruvate kinase
RSP673_09255	RSP797_09160	UW163_RS13735	RRSL_00232	CQ06_07290	KR96_22530	RCFBP_20023	RSP597_08575	RSP795_08545	RSK60v3_1360023	RSc1410	RSP799_11430		1-deoxy-D-xylulose 5-phosphate reductoisomerase
RSP673_09185	RSP797_09090	UW163_RS13805	RRSL_00097	CQ06_07360	KR96_22460	RCFBP_20012	RSP597_08520	RSP795_08490	RSK60v3_1360011	RSc1421	RSP799_11490		Phosphoenolpyruvate synthase
RSP673_08615	RSP797_08555	UW163_RS14335	RRSL_01619	CQ06_13515	KR96_21880	RCFBP_11789	RSP597_07935	RSP795_07905	RSK60v3_1260013	RSc1784	RSP799_08445		Thymidylate kinase
RSP673_06715	RSP797_06595	UW163_RS11160	RRSL_02506	CQ06_03490	KR96_09250	RCFBP_11407	RSP597_06330	RSP795_06350	RSK60v3_970008	RSc1979	RSP799_06475	folC	folylpolyglutamate synthase / dihydrofolate synthase
RSP673_01350	RSP797_18910	UW163_RS05815	RRSL_03979	CQ06_11285	KR96_00470	RCFBP_10310	RSP597_01310	RSP795_00950	RSK60v3_300014	RSc3127	RSP799_01075		Ethanolamine ammonia-lyase heavy chain
RSP673_09720	RSP797_09850	UW163_RS13295	RRSL_00075	CQ06_05545	KR96_03890	RCFBP_20104	RSP597_08990	RSP795_08945	RSK60v3_1400021	RSc1322	RSP799_10925		Aminotransferase DeqT (envelope biogenesis)
RSP673_02690	RSP797_02670	UW163_RS07150	RRSL_02716	CQ06_10020	KR96_19750	RCFBP_10578	RSP597_02530	RSP795_02115	RSK60v3_420050	RSc2879	RSP799_20825		Ribulose-phosphate 3-epimerase
RSP673_02685	RSP797_02665	UW163_RS07145	RRSL_02717	CQ06_10025	KR96_19745	RCFBP_10577	RSP597_02525	RSP795_02110	RSK60v3_420049	RSc2880	RSP799_20830	gph	Phosphoglycolate phosphatase
RSP673_17925	RSP797_17805	UW163_RS22235	RRSL_00553	CQ06_19940	KR96_24440	RCFBP_mp10556	RSP597_18670	RSP795_01255	RSK60v3_mp860008	RSp0532	RSP799_18215		Puromycin-sensitive aminopeptidase
RSP673_11805	RSP797_11910	UW163_RS16010	RRSL_00210	CQ06_00505	KR96_02660	RCFBP_20569	RSP597_11145	RSP795_11255	RSK60v3_1580088	RSc0912	RSP799_08830		N-acetylglucosaminyl transferase
RSP673_11830	RSP797_11935	UW163_RS16035	RRSL_00205	CQ06_00480	KR96_02685	RCFBP_20574	RSP597_11170	RSP795_11280	RSK60v3_1590004	RSc0907	RSP799_08805		3-phosphoshikimate 1-carboxyvinyltransferase
RSP673_11840	RSP797_11945	UW163_RS16045	RRSL_01081	CQ06_00470	KR96_02695	RCFBP_20576	RSP597_11180	RSP795_11290	RSK60v3_1590006	RSc0905	RSP799_08795		histidinol-phosphate transaminase
RSP673_11845	RSP797_11950	UW163_RS16050	RRSL_01082	CQ06_00465	KR96_02700	RCFBP_20577	RSP597_11185	RSP795_11295	RSK60v3_1590007	RSc0904	RSP799_08790		chorismate mutase / prephenate dehydratase
RSP673_17280	RSP797_17365	UW163_RS22855	RRSL_03726	CQ06_21380	KR96_07140	RCFBP_mp10240	RSP597_17250	RSP795_23095	RSK60v3_mp1070002	RSp0238	RSP799_16975	glgX	Glycogen debranching enzyme GlgX (isoamylase metabolism)
RSP673_21565	RSP797_22465	UW163_RS19475	RRSL_01023	CQ06_10850	KR96_15075	RCFBP_mp20280	RSP597_20310	RSP795_20495	RSK60v3_mp620005	RSp0836	RSP799_19165		Nicotinamide phosphoribosyltransferase
RSP673_21560	RSP797_22460	UW163_RS19470	RRSL_01024	CQ06_10845	KR96_15080	RCFBP_mp20279	RSP597_20305	RSP795_20500	RSK60v3_mp620006	RSp0835	RSP799_19160		Nicotinamide-nucleotide adenylyltransferase / Nudix hydrolase
RSP673_02570	RSP797_02550	UW163_RS07030	RRSL_02739	CQ06_10135	KR96_19635	RCFBP_10553	RSP597_02390	RSP795_01990	RSK60v3_420024	RSc2903	RSP799_02170		Peptide release factor-glutamine N5-methyltransferase
RSP673_00665	RSP797_00760	UW163_RS04875	RRSL_03665	CQ06_12495	KR96_01295	RCFBP_10165	RSP597_00505	RSP795_00380	RSK60v3_240030	RSc3303	RSP799_00585		Uroporphyrinogen decarboxylase
RSP673_04445	RSP797_04400	UW163_RS08895	RRSL_03837	CQ06_23430	KR96_18950	RCFBP_10968	RSP597_04320	RSP795_04345	RSK60v3_670038	RSc2457	RSP799_04120		Riboflavin kinase / FMN adenylyltransferase
RSP673_23530	RSP797_07090	UW163_RS17010	RRSL_02531	CQ06_07690	KR96_11555	RCFBP_mp30468	RSP597_24345	RSP795_16915	RSK60v3_mp170016	RSp1583	RSP799_22455		putative O-acetylhomoserine sulfhydrylase / O-acetylserine sulfhydrylase
RSP673_23680	RSP797_06945	UW163_RS16865	RRSL_00777	CQ06_07820	KR96_11690	RCFBP_mp30494	RSP597_24485	RSP795_19530	RSK60v3_mp160021	RSp1615	RSP799_22550		Galactarate/altronate dehydratase family protein
Motility
RSP673_02960	RSP797_02965	UW163_RS07445	RRSL_00259	CQ06_15195	KR96_09790	RCFBP_10635	RSP597_02810	RSP795_02930	RSK60v3_440050	RSc2825	RSP799_02670	pilB	Probable Type IV pilus assembly protein
RSP673_02955	RSP797_02960	UW163_RS07440	RRSL_00260	CQ06_15190	KR96_09795	RCFBP_10634	RSP597_02805	RSP795_02925	RSK60v3_440049	RSc2826	RSP799_02665	pilC	Probable Fimbrial Assembly transmembrane protein
RSP673_12925	RSP797_13465	UW163_RS00975	RRSL_04271	CQ06_11870	KR96_06300	RCFBP_20744	RSP597_12095	RSP795_13005	RSK60v3_1720095	RSc0671	RSP799_12715	PilJ	Chemotaxis protein PilJ
Oxidation-reduction
RSP673_03675	RSP797_03670	UW163_RS08140	RRSL_03217	CQ06_18785	KR96_12705	RCFBP_10783	RSP597_03595	RSP795_03655	RSK60v3_540004	RSc2664	RSP799_03395		(S)-2-hydroxy-acid oxidase chain D
RSP673_15390	RSP797_15810	UW163_RS03350	RRSL_04300	CQ06_15800	KR96_17750	RCFBP_21281	RSP597_14775	RSP795_15055	RSK60v3_20003	RSc0172	RSP799_15155		FAD-linked oxidase
RSP673_06260	RSP797_06165	UW163_RS10730	RRSL_03887	CQ06_17735	KR96_08810	RCFBP_11323	RSP597_05900	RSP795_05925	RSK60v3_930017	RSc2065	RSP799_06050		NADH-ubiquinone oxidoreductase
RSP673_06310	RSP797_06215	UW163_RS10780	RRSL_03896	CQ06_17785	KR96_08860	RCFBP_11332	RSP597_05950	RSP795_05975	RSK60v3_940009	RSc2056	RSP799_06100		NADH-ubiquinone oxidoreductase subunit G
RSP673_06335	RSP797_06240	UW163_RS10805	RRSL_03901	CQ06_17810	KR96_08885	RCFBP_11337	RSP597_05975	RSP795_06000	RSK60v3_940014	RSc2051	RSP799_06125	nuoL	NADH-ubiquinone oxidoreductase subunit L
RSP673_06345	RSP797_06250	UW163_RS10815	RRSL_03903	CQ06_17820	KR96_08895	RCFBP_11339	RSP597_05985	RSP795_06010	RSK60v3_940016	RSc2049	RSP799_06135	nuoN	NADH-ubiquinone oxidoreductase subunit N
RSP673_13960	RSP797_14450	UW163_RS01980	RRSL_03823	CQ06_15485	KR96_16910	RCFBP_20993	RSP597_13155	RSP795_13940	RSK60v3_1910006	RSc0489	RSP799_13695		Peroxiredoxin
RSP673_04620	RSP797_04580	UW163_RS09070	RRSL_03591	CQ06_02995	KR96_06030	RCFBP_11001	RSP597_04495	RSP795_04515	RSK60v3_690010	RSc2425	RSP799_04290		Ferredoxin-NADP reductase
RSP673_20100	RSP797_20995	UW163_RS20910	RRSL_04711	CQ06_01280	KR96_23475	RCFBP_mp20653	RSP597_22195	RSP795_18960	RSK60v3_mp320023	RSp1173	RSP799_21000		cytochrome C peroxidase
RSP673_03255	RSP797_03245	UW163_RS07725	RRSL_02689	CQ06_13795	KR96_09510	RCFBP_10693	RSP597_03110	RSP795_03210	RSK60v3_500019	RSc2767	RSP799_02965		NADP-dependent malate dehydrogenase
RSP673_07960	RSP797_07925	UW163_RS14965	RRSL_04528	CQ06_22520	KR96_16140	RCFBP_11609	RSP597_07290	RSP795_06995	RSK60v3_1190003	RSc1603	RSP799_07775	lpdA	Dihydrolipoamide dehydrogenase
RSP673_08050	RSP797_08010	UW163_RS14880	RRSL_04544	CQ06_22610	KR96_16055	RCFBP_11626	RSP597_07380	RSP795_07085	RSK60v3_1210007	RSc1619	RSP799_07870		Dihydroorotate dehydrogenase
RSP673_23165	RSP797_24100	UW163_RS17360	RRSL_00922	CQ06_03740	KR96_21915	RCFBP_mp10348	RSP597_17745	RSP795_12090	RSK60v3_mp980003	RSp0325	RSP799_17425		Carbon monoxide dehydrogenase
RSP673_00535	RSP797_00630	UW163_RS04745	RRSL_03691	CQ06_12625	KR96_01425	RCFBP_10138	RSP597_00375	RSP795_00250	RSK60v3_240004	RSc3328	RSP799_00455		Putative tRNA (5-carboxymethylaminomethyl-2-thiouridylate) synthase subunit GidA
RSP673_23520	RSP797_07100	UW163_RS17020	RRSL_02532	CQ06_07685	KR96_11550	RCFBP_mp30465	RSP597_24340	RSP795_16920	RSK60v3_mp170019	RSp1581	RSP799_22445	katE	Catalase
RSP673_11835	RSP797_11940	UW163_RS16040	RRSL_01080	CQ06_00475	KR96_02690	RCFBP_20575	RSP597_11175	RSP795_11285	RSK60v3_1590005	RSc0906	RSP799_08800		Arogenate dehydrogenase / Prephenate dehydrogenase
RSP673_02520	RSP797_02500	UW163_RS06980	RRSL_02749	CQ06_10190	KR96_19585	RCFBP_10542	RSP597_02340	RSP795_01935	RSK60v3_420013	RSc2914	RSP799_02120	cyoD1	Cytochrome o ubiquinol oxidase subunit IV
Stress response
RSP673_10470	RSP797_10605	UW163_RS12570	RRSL_00292	CQ06_14490	KR96_03115	RCFBP_20253	RSP597_09760	RSP795_09680	RSK60v3_1460012	RSc1180	RSP799_10120		MATE family efflux transporter
RSP673_08245	RSP797_08195	UW163_RS14695	RRSL_04580	CQ06_22795	KR96_15870	RCFBP_11663	RSP597_07565	RSP795_07550	RSK60v3_1220033	RSc1654	RSP799_08050		Drug efflux protein
RSP673_03800	RSP797_03800	UW163_RS08265	RRSL_03192	CQ06_08825	KR96_12580	RCFBP_10808	RSP597_03715	RSP795_03775	RSK60v3_570007	RSc2639	RSP799_03530	grpE	probable heat shock protein 24 (GRpE)
RSP673_21465	RSP797_22370	UW163_RS19380	RRSL_01042	CQ06_10755	KR96_15175	RCFBP_mp20257	RSP597_20205	RSP795_20600	RSK60v3_mp620025	RSp0818	RSP799_19075		multidrug efflux RND transporter permease subunit
RSP673_21460	RSP797_22365	UW163_RS19375	RRSL_01043	CQ06_10750	KR96_15180	RCFBP_mp20256	RSP597_20200	RSP795_20605	RSK60v3_mp620026	RSp0817	RSP799_19070		OprM family multidrug efflux complex outer membrane factor
RSP673_17375	RSP797_17465	UW163_RS22765	RRSL_01710	CQ06_21280	KR96_18455	RCFBP_mp10256	RSP597_17330	RSP795_22770	RSK60v3_mp1050046	RSp0255	RSP799_17075		methyl-accepting chemotaxis protein
RSP673_15740	RSP797_16160	UW163_RS03685	RRSL_04369	CQ06_16135	KR96_10570	RCFBP_21348	RSP597_15150	RSP795_15375	RSK60v3_90005	RSc0098	RSP799_15520		Alkaline phosphatase (regulated by phoA)
RSP673_20000	RSP797_20895	UW163_RS21010	RRSL_04677	CQ06_07515	KR96_04395	RCFBP_mp30019	RSP597_22335	RSP795_18825	RSK60v3_mp310017	RSp1198	RSP799_21125		Transmembrane drug efflux pump
RSP673_03405	RSP797_03395	UW163_RS07875	RRSL_00727	CQ06_20555	KR96_09355	RCFBP_10724	RSP597_03260	RSP795_03360	RSK60v3_510026	RSc2726	RSP799_03140		Transmembrane multidrug resistance transport protein. HLYD family
RSP673_11080	RSP797_11255	UW163_RS11920	RRSL_01160	CQ06_09335	KR96_02005	RCFBP_20420	RSP597_10375	RSP795_10530	RSK60v3_1530018	RSc1057	RSP799_09505	rseB	Sigma-E factor sensor in periplasmic stress
RSP673_19915	RSP797_20650	UW163_RS21090	RRSL_04658	CQ06_07430	KR96_04485	RCFBP_mp30038	RSP597_22430	RSP795_18740	RSK60v3_mp310001	RSp1213	RSP799_21200		MATE family efflux transporter
RSP673_09750	RSP797_09880	UW163_RS13265	RRSL_00136	CQ06_05575	KR96_03860	RCFBP_20110	RSP597_09020	RSP795_08975	RSK60v3_1400027	RSc1316	RSP799_10835	phoH	Phosphate starvation protein domain
RSP673_17905	RSP797_17785	UW163_RS22255	RRSL_00557	CQ06_19920	KR96_24460	RCFBP_mp10552	RSP597_18650	RSP795_01275	RSK60v3_mp860012	RSp0528	RSP799_18195		Probable outer membrane cation efflux system
RSP673_00645	RSP797_00740	UW163_RS04855	RRSL_03669	CQ06_12515	KR96_01315	RCFBP_10160	RSP597_00485	RSP795_00360	RSK60v3_240026	RSc3307	RSP799_00565		Probable transmembrane methyl-accepting chemotaxis protein
Transcriptional regulators
RSP673_20355	RSP797_21245	UW163_RS20670	RRSL_03186	CQ06_14900	KR96_08370	RCFBP_mp20598	RSP597_21925	RSP795_19225	RSK60v3_mp350019	RSp1096	RSP799_20250		Lys family transcriptional regulator
RSP673_00785	RSP797_00880	UW163_RS04995	RRSL_02791	CQ06_12390	KR96_01175	RCFBP_10190	RSP597_00635	RSP795_00505	RSK60v3_260012	RSc3287	RSP799_00675	solR	Acyl-homoserine-lactone-synthase (Ahl) quorum sensing regulator (Flvier et al, 1997 Journal of bacteriology)
RSP673_20780	RSP797_21710	UW163_RS18740	RRSL_02242	CQ06_04580	KR96_23080	RCFBP_mp20090	RSP597_19460	RSP795_23490	RSK60v3_mp750039	RSp0645	RSP799_18670		AsnC family transcriptional regulator
RSP673_15830	RSP797_16250	UW163_RS03775	RRSL_02001	CQ06_16230	KR96_10475	RCFBP_21366	RSP597_15245	RSP795_15470	RSK60v3_90024	RSc0078	RSP799_15610		XrE family transcriptional regulator
RSP673_09865	RSP797_09990	UW163_RS13155	RRSL_00358	CQ06_05685	KR96_03715	RCFBP_20132	RSP597_09125	RSP795_09080	RSK60v3_1400052	RSc1295	RSP799_10735		MarR family transcriptional regulator
RSP673_03365	RSP797_03355	UW163_RS07835	RRSL_00734	CQ06_13905	KR96_09395	RCFBP_10716	RSP597_03220	RSP795_03320	RSK60v3_510018	RSc2734	RSP799_03100		Response regulator/ transcriptional regulator
RSP673_03355	RSP797_03345	UW163_RS07825	RRSL_00737	CQ06_13895	KR96_09410	RCFBP_10714	RSP597_03210	RSP795_03310	RSK60v3_510014	RSc2736	RSP799_03090	phcS	Sensor histidine kinase/ transcriptional regulator
RSP673_03350	RSP797_03340	UW163_RS07820	RRSL_00738	CQ06_13890	KR96_09415	RCFBP_10713	RSP597_03205	RSP795_03305	RSK60v3_510013	RSc2737	RSP799_03085	phcR	Response regulator/ transcriptional regulator (inhibitor of Pca?)
RSP673_08000	RSP797_07965	UW163_RS14925	RRSL_04535	CQ06_22560	KR96_16100	RCFBP_11617	RSP597_07330	RSP795_07035	RSK60v3_1200001	RSc1610	RSP799_07815		LclR family transcriptional regulator
RSP673_21605	RSP797_22510	UW163_RS19515	RRSL_01015	CQ06_10895	KR96_15035	RCFBP_mp20287	RSP597_20350	RSP795_20455	RSK60v3_mp610002	RSp0843	RSP799_19205		HxlR family transcriptional regulator
RSP673_01645	RSP797_01645	UW163_RS06095	RRSL_02899	CQ06_08545	KR96_00180	RCFBP_10369	RSP597_01570	RSP795_01535	RSK60v3_360007	RSc3079	RSP799_01310		Sensor histidine kinase/ transcriptional regulator
RSP673_01560	RSP797_01565	UW163_RS06015	RRSL_03152	CQ06_02380	KR96_00270	RCFBP_10352	RSP597_01520	RSP795_01485	RSK60v3_350004	RSc3087	RSP799_01260	kdpE	Response regulator/ transcriptional regulator related with turgor
RSP673_22940	RSP797_23910	UW163_RS17550	RRSL_02322	CQ06_23165	KR96_22165	RCFBP_mp10408	RSP597_18030	RSP795_11580	RSK60v3_mp950013	RSp0381	RSP799_17705		Lux family transcriptional regulator
RSP673_14840	RSP797_15315	UW163_RS02820	RRSL_03337	CQ06_08270	KR96_20370	RCFBP_21162	RSP597_14015	RSP795_16380	RSK60v3_2060017	RSc0325	RSP799_14520		XrE family transcriptional regulator
RSP673_05735	RSP797_05635	UW163_RS10130	RRSL_03476	CQ06_16860	KR96_24530	RCFBP_11206	RSP597_05405	RSP795_05440	RSK60v3_860032	RSc2190	RSP799_05515		YebC/PmpR family transcriptional regulator
RSP673_10445	RSP797_10580	UW163_RS12595	RRSL_00298	CQ06_14515	KR96_03140	RCFBP_20247	RSP597_09730	RSP795_09650	RSK60v3_1460006	RSc1186	RSP799_10150		Fis family transcriptional regulator
Transport
RSP673_05855	RSP797_05770	UW163_RS10260	RRSL_03452	CQ06_16745	KR96_23255	RCFBP_11229	RSP597_05520	RSP795_05555	RSK60v3_900018	RSc2166	RSP799_05630		C4-dicarboxylate-ABC transporter
RSP673_02765	RSP797_02770	UW163_RS07250	RRSL_01970	CQ06_15000	KR96_09985	RCFBP_10595	RSP597_02605	RSP795_02735	RSK60v3_440011	RSc2864	RSP799_02475		ABC transporter permease
RSP673_05615	RSP797_05520	UW163_RS10015	RRSL_03499	CQ06_16975	KR96_20020	RCFBP_11182	RSP597_05290	RSP795_05330	RSK60v3_860010	RSc2212	RSP799_05405		HlyC/CorC family transporter
RSP673_05310	RSP797_05220	UW163_RS09720	RRSL_00604	CQ06_03200	KR96_05260	RCFBP_11122	RSP597_05000	RSP795_05055	RSK60v3_810010	RSc2277	RSP799_05275		magnesium transporter
RSP673_03455	RSP797_03445	UW163_RS07925	RRSL_00717	CQ06_20605	KR96_23770	RCFBP_10734	RSP597_03310	RSP795_03410	RSK60v3_510036	RSc2716	RSP799_03190	secF	Protein translocase subunit SecF
RSP673_20210	RSP797_21105	UW163_RS20800	RRSL_04735	CQ06_03420	KR96_08490	RCFBP_mp20633	RSP597_22090	RSP795_19060	RSK60v3_mp320043	RSp1140	RSP799_20920		Amino acid ABC transporter substrate-binding
RSP673_00315	RSP797_00410	UW163_RS04515	RRSL_00850	CQ06_05080	KR96_17410	RCFBP_10092	RSP597_14390	RSP795_00035	RSK60v3_210006	RSc3371	RSP799_00250		ABC transporter permease protein
RSP673_16880	RSP797_16985	UW163_RS23265	RRSL_00481	CQ06_23535	KR96_07500	RCFBP_mp10141	RSP597_16765	RSP795_23660	RSK60v3_mp20004	RSp0148	RSP799_16575	gspE	Type II general secretion pathway protein E
RSP673_05810	RSP797_05725	UW163_RS10215	RRSL_03462	CQ06_16790	KR96_23300	RCFBP_11220	RSP597_05475	RSP795_05510	RSK60v3_900008	RSc2175	RSP799_05585		ABC transporter permease
RSP673_14025	RSP797_14510	UW163_RS02045	RRSL_03809	CQ06_15425	KR96_16970	RCFBP_21006	RSP597_13220	RSP795_14000	RSK60v3_1910019	RSc0478	RSP799_13760		Metal ABC transporter permease (bacteriocin transporter domain)?
RSP673_14010	RSP797_14495	UW163_RS02030	RRSL_03813	CQ06_15440	KR96_16955	RCFBP_21002	RSP597_13205	RSP795_13985	RSK60v3_1910015	RSc0481	RSP799_13745		Amino acid ABC transporter permease
RSP673_14005	RSP797_14490	UW163_RS02025	RRSL_03814	CQ06_15445	KR96_16950	RCFBP_21001	RSP597_13200	RSP795_13980	RSK60v3_1910014	RSc0482	RSP799_13740	gltJ	Amino acid ABC transporter permease
RSP673_00680	RSP797_00775	UW163_RS04890	RRSL_03661	CQ06_12480	KR96_01280	RCFBP_10168	RSP597_00525	RSP795_00395	RSK60v3_250002	RSc3300	RSP799_00605		Amino acid ABC transporter substrate-binding
RSP673_15795	RSP797_16215	UW163_RS03740	RRSL_04382	CQ06_16195	KR96_10510	RCFBP_21360	RSP597_15210	RSP795_15435	RSK60v3_90017	RSc0084	RSP799_15575		Amino acid ABC transporter substrate-binding
RSP673_12595	RSP797_13130	UW163_RS00645	RRSL_04209	CQ06_12190	KR96_06620	RCFBP_20679	RSP597_11755	RSP795_12680	RSK60v3_1720019	RSc0734	RSP799_12355	tolA	TonB-dependent receptor protein
RSP673_11350	RSP797_11525	UW163_RS11645	RRSL_04402	CQ06_18670	KR96_02275	RCFBP_20478	RSP597_10655	RSP795_10805	RSK60v3_1580012	RSc1002	RSP799_09220		Transporter, drug/metabolite exporter family
RSP673_10380	RSP797_10515	UW163_RS12660	RRSL_02110	CQ06_03800	KR96_03200	RCFBP_20235	RSP597_09660	RSP795_09585	RSK60v3_1450017	RSc1198	RSP799_10225		ABC transporter substrate-binding protein
RSP673_14335	RSP797_14835	UW163_RS02340	RRSL_03752_1	CQ06_11430	KR96_18320	RCFBP_21066	RSP597_13535	RSP795_14305	RSK60v3_1950019	RSc0421	RSP799_14045		MFS transporter
RSP673_14395	RSP797_14890	UW163_RS02395	RRSL_03743	CQ06_11485	KR96_18265	RCFBP_21077	RSP597_13590	RSP795_14360	RSK60v3_2030003	RSc0411	RSP799_14100		LPS export ABC transporter periplasmic
RSP673_14420	RSP797_14915	UW163_RS02420	RRSL_03738	CQ06_11510	KR96_18240	RCFBP_21082	RSP597_13615	RSP795_14385	RSK60v3_2030008	RSc0406	RSP799_14125		PTSIIA-like sugar transporter protein
RSP673_14615	RSP797_15110	UW163_RS02615	RRSL_03294	CQ06_11705	KR96_18045	RCFBP_21120	RSP597_13810	RSP795_14580	RSK60v3_2040025	RSc0367	RSP799_14325		MFS transporter
RSP673_20080	RSP797_20975	UW163_RS20930	RRSL_04706	CQ06_01300	KR96_23495	RCFBP_mp20659	RSP597_22225	RSP795_18930	RSK60v3_mp320017	RSp1177	RSP799_21020		Major Facilitator Superfamily MFS protein transporter
RSP673_07880	RSP797_07840	UW163_RS15035	RRSL_04514	CQ06_14190	KR96_20525	RCFBP_11595	RSP597_07215	RSP795_21260	RSK60v3_1140006	RSc1588	RSP799_07700		Amino acid ABC transporter permease
RSP673_09970	RSP797_10095	UW163_RS13065	RRSL_01403	CQ06_05790	KR96_03610	RCFBP_20153	RSP597_09230	RSP795_09185	RSK60v3_1410018	RSc1274	RSP799_10630		Copper-translocating Atpase (E1-E2 type cation ATPase domain)
RSP673_09425	RSP797_09320	UW163_RS13580	RRSL_01348	CQ06_07135	KR96_04180	RCFBP_20051	RSP597_08725	RSP795_08685	RSK60v3_1380019	RSc1381	RSP799_11265	gsiC	Glutathione ABC transporter permease
RSP673_01450	RSP797_01450	UW163_RS05910	RRSL_03996	CQ06_11370	KR96_00385	RCFBP_10328	RSP597_01410	RSP795_01025	RSK60v3_310006	RSc3109	RSP799_01155	gspJ	Type II general secretion pathway protein J
RSP673_10495	RSP797_10655	UW163_RS12520	RRSL_00144	CQ06_14440	KR96_21365	RCFBP_20257	RSP597_09820	RSP795_09730	RSK60v3_1470002	RSc1176	RSP799_10070		putative oligopeptide transporter
RSP673_23490	RSP797_07135	UW163_RS17055	RRSL_02540	CQ06_07650	KR96_11515	RCFBP_mp30458	RSP597_24305	RSP795_16955	RSK60v3_mp170026	RSp1575	RSP799_22415		Amino acid ABC transporter substrate-binding
RSP673_04545	RSP797_04500	UW163_RS08995	RRSL_03578	CQ06_03065	KR96_19050	RCFBP_10989	RSP597_04435	RSP795_04445	RSK60v3_670058	RSc2437	RSP799_04220		Amino acid ABC transporter ATpase
RSP673_03040	RSP797_03045	UW163_RS07525	RRSL_02646	CQ06_15275	KR96_09710	RCFBP_10650	RSP597_02895	RSP795_03010	RSK60v3_440065	RSc2810	RSP799_02760		ABC transporter permease
Pathogenicity
RSP673_20360	RSP797_21250	UW163_RS20665	RRSL_03185	CQ06_14895	KR96_08365	RCFBP_mp20597	RSP597_21920	RSP795_19230	RSK60v3_mp350020	RSp1095	RSP799_20245		Hemolysin activated secretion protein
RSP673_01115	RSP797_19135	UW163_RS05595	RRSL_00251	CQ06_08095	KR96_00930	RCFBP_10265	RSP597_01100	RSP795_00745	RSK60v3_280007	RSc3162	RSP799_00895		Hemagglutinin-related protein
RSP673_04010	RSP797_03965	UW163_RS08425	RRSL_01219	CQ06_17555	KR96_12430	RCFBP_10841	RSP597_03885	RSP795_03935	RSK60v3_580014	RSc2557	RSP799_03680	mviN	lipid II flipase/MviN-like virulence factor
RSP673_08490	RSP797_08435	UW163_RS14455	RRSL_01594	CQ06_13640	KR96_21760	RCFBP_11765	RSP597_07810	RSP795_07785	RSK60v3_1250016	RSc1756	RSP799_08290	pehB	Exo-poly-alpha-D-galacturonosidase precursor(Huang and Allen 2000)
RSP673_22175	RSP797_23105	UW163_RS20055	RRSL_01063	CQ06_06270	KR96_11090	RCFBP_mp20465	RSP597_21290	RSP795_19680	RSK60v3_mp470017	RSp1020	RSP799_19885	epsA	Polysaccharide transport (part of Exopolysaccharide operon)
RSP673_22165	RSP797_23095	UW163_RS20045	RRSL_01061	CQ06_06260	KR96_11080	RCFBP_mp20463	RSP597_21280	RSP795_19690	RSK60v3_mp470019	RSp1018	RSP799_19875	epsB	Polysaccharide biosynthetic process (part of Exopolysaccharide operon)
RSP673_22115	RSP797_23045	UW163_RS19995	RRSL_01051	CQ06_06210	KR96_11030	RCFBP_mp20453	RSP597_21230	RSP795_19740	RSK60v3_mp470029	RSp1008	RSP799_19825		probable glycosyl transferase transmembrane protein
RSP673_22105	RSP797_23035	UW163_RS19985	RRSL_01049	CQ06_06200	KR96_11020	RCFBP_mp20451	RSP597_21220	RSP795_19750	RSK60v3_mp470031	RSp1006	RSP799_19815		Putative Eps aminotransferase
RSP673_22085	RSP797_23015	UW163_RS19965	RRSL_01356	CQ06_06180	KR96_11000	RCFBP_mp20446	RSP597_21200	RSP795_19770	RSK60v3_mp470037	RSp1002	RSP799_19795	tek	Tek protein(1996 Denny et al. MPMI 9:272-281. )
RSP673_23285	RSP797_24220	UW163_RS17240	RRSL_00947	CQ06_08630	KR96_22030	RCFBP_mp10324	RSP597_17625	RSP795_12210	RSK60v3_mp1000002	RSp0304	RSP799_17335	ripD	T3 Effector (AvrPPhD)
Unknown
RSP673_03610	RSP797_03615	UW163_RS08085	RRSL_03229	CQ06_18845	KR96_12765	RCFBP_10772	RSP597_03540	RSP795_03600	RSK60v3_530008	RSc2676	RSP799_03330		Hypothetical Protein
RSP673_10455	RSP797_10590	UW163_RS12585	RRSL_00295	CQ06_14505	KR96_03130	RCFBP_20249	RSP597_09740	RSP795_09660	RSK60v3_1460008	RSc1184	RSP799_10140		Hypothetical protein (membrane)
RSP673_01135	RSP797_19120	UW163_RS05610	RRSL_00248	CQ06_08110	KR96_00915	RCFBP_10268	RSP597_01115	RSP795_00760	RSK60v3_280010	RSc3159	RSP799_00910		Hypothetical protein (Methyltransferase)
RSP673_05500	RSP797_05405	UW163_RS09900	RRSL_03523	CQ06_17090	KR96_19880	RCFBP_11158	RSP597_05175	RSP795_05215	RSK60v3_840013	RSc2234	RSP799_02430		Hypothetical Protein
RSP673_10635	RSP797_10795	UW163_RS12385	RRSL_01927	CQ06_09795	KR96_01545	RCFBP_20283	RSP597_09965	RSP795_09875	RSK60v3_1500006	RSc1150	RSP799_09940		Hypothetical Protein
RSP673_20430	RSP797_21325	UW163_RS20595	RRSL_03171	CQ06_14825	KR96_08295	RCFBP_mp20583	RSP597_21850	RSP795_19300	RSK60v3_mp350036	RSp1080	RSP799_20170		Hypothetical protein (membrane)
RSP673_05270	RSP797_05180	UW163_RS09680	RRSL_00596	CQ06_03160	KR96_05300	RCFBP_11116	RSP597_04965	RSP795_05020	RSK60v3_810002	RSc2286	RSP799_05240		Hypothetical protein (Methyltransferase)
RSP673_14225	RSP797_14715	UW163_RS02235	RRSL_03773	CQ06_19300	KR96_24255	RCFBP_21044	RSP597_13415	RSP795_14200	RSK60v3_1930004	RSc0440	RSP799_13950		hypothetical protein
RSP673_06550	RSP797_06450	UW163_RS11015	RRSL_02476	CQ06_06690	KR96_09100	RCFBP_11377	RSP597_06175	RSP795_06200	RSK60v3_940056	RSc2007	RSP799_06330		Hypothetical protein (membrane)
RSP673_04005	RSP797_03960	UW163_RS08420	RRSL_01220	CQ06_17550	KR96_12435	RCFBP_10840	RSP597_03880	RSP795_03930	RSK60v3_580013	RSc2558	RSP799_03675		Hypothetical protein (transglutaminase)
RSP673_03875	RSP797_03875	UW163_RS08340	RRSL_01236	CQ06_08900	KR96_12510	RCFBP_10823	RSP597_03790	RSP795_03850	RSK60v3_570021	RSc2624	RSP799_03600		Hypothetical protein (membrane)
RSP673_18330	RSP797_18170	UW163_RS17935	RRSL_04636	CQ06_06910	KR96_11220	RCFBP_mp30408	RSP597_24065	RSP795_17185	RSK60v3_mp170077	RSp1527	RSP799_22210		Hypothetical Protein
RSP673_16875	RSP797_16980	UW163_RS23270	RRSL_00480	CQ06_23540	KR96_07505	RCFBP_mp10140	RSP597_16760	RSP795_23665	RSK60v3_mp20005	RSp0147	RSP799_16570		Hypothetical protein
RSP673_16805	RSP797_16915	UW163_RS23335	RRSL_00471	CQ06_23585	KR96_07570	RCFBP_mp10126	RSP597_16690	RSP795_23730	RSK60v3_mp20015	RSp0135	RSP799_16520		Hypothetical Protein (lyase)
RSP673_21075	RSP797_22010	UW163_RS19030	RRSL_02225	CQ06_02090	KR96_19290	RCFBP_mp20159	RSP597_19785	RSP795_20990	RSK60v3_mp710014	RSp0716	RSP799_20595		Hypothetical protein
RSP673_21070	RSP797_22005	UW163_RS19025	RRSL_02226	CQ06_02085	KR96_19285	RCFBP_mp20158	RSP597_19780	RSP795_20995	RSK60v3_mp710015	RSp0715	RSP799_20590		Hypothetical protein
RSP673_14100	RSP797_14590	UW163_RS02115	RRSL_03797	CQ06_15355	KR96_17040	RCFBP_21020	RSP597_13290	RSP795_14070	RSK60v3_1910033	RSc0464	RSP799_13830		Hypothetical Protein
RSP673_00685	RSP797_00780	UW163_RS04895	RRSL_03660	CQ06_12475	KR96_01275	RCFBP_10169	RSP597_00530	RSP795_00400	RSK60v3_250003	RSc3299	RSP799_00615		Hypothetical Protein
RSP673_23115	RSP797_24065	UW163_RS17405	RRSL_00080	CQ06_18285	KR96_22320	RCFBP_mp10357	RSP597_17785	RSP795_12065	RSK60v3_mp970004	RSp0334	RSP799_17475		Hypothetical Protein(Diguanylate cyclase)
RSP673_12205	RSP797_12755	UW163_RS00270	RRSL_02395	CQ06_12940	KR96_07040	RCFBP_20600	RSP597_11355	RSP795_22355	RSK60v3_1670006	RSc0815	RSP799_11980		Hypothetical Protein
RSP673_15855	RSP797_16275	UW163_RS03800	RRSL_02006	CQ06_16255	KR96_10450	RCFBP_21371	RSP597_15270	RSP795_15495	RSK60v3_90029	RSc0073	RSP799_15635		Hypothetical Protein
RSP673_02175	RSP797_02175	UW163_RS06645	RRSL_01876	CQ06_10500	KR96_16370	RCFBP_10474	RSP597_02015	RSP795_02420	RSK60v3_410001	RSc2976	RSP799_01790		Hypothetical protein (membrane)
RSP673_02345	RSP797_02345	UW163_RS06815	RRSL_02777	CQ06_10335	KR96_16540	RCFBP_10508	RSP597_02185	RSP795_02590	RSK60v3_410035	RSc2943	RSP799_01965		Hypothetical Protein
RSP673_11390	RSP797_11565	UW163_RS11605	RRSL_04409	CQ06_18630	KR96_02315	RCFBP_20486	RSP597_10695	RSP795_10845	RSK60v3_1580020	RSc0994	RSP799_09180		Hypothetical protein (membrane)
RSP673_16295	RSP797_19750	UW163_RS16460	RRSL_00623	CQ06_14575	KR96_12140	RCFBP_mp10013	RSP597_16200	RSP795_24170	RSK60v3_mp90043	RSp0012	RSP799_22855		Hypothetical Protein (diguanylate cyclase)
RSP673_16285	RSP797_19740	UW163_RS16470	RRSL_00620	CQ06_14585	KR96_12130	RCFBP_mp10011	RSP597_16190	RSP795_24180	RSK60v3_mp90045	RSp0010	RSP799_22845		Hypothetical protein (membrane)
RSP673_14450	RSP797_14945	UW163_RS02450	RRSL_03732	CQ06_11540	KR96_18210	RCFBP_21088	RSP597_13645	RSP795_14415	RSK60v3_2030015	RSc0400	RSP799_14155		Hypothetical protein
RSP673_14460	RSP797_14955	UW163_RS02460	RRSL_03730	CQ06_11550	KR96_18200	RCFBP_21090	RSP597_13655	RSP795_14425	RSK60v3_2030017	RSc0398	RSP799_14165		Hypothetical protein (Tetratricopeptide repeat family protein)
RSP673_02145	RSP797_02140	UW163_RS06610	RRSL_01870	CQ06_10530	KR96_16340	RCFBP_10468	RSP597_01985	RSP795_02390	RSK60v3_400042	RSc2982	RSP799_01755		Hypothetical protein (membrane)
RSP673_05905	RSP797_05820	UW163_RS10390	RRSL_03445	CQ06_16700	KR96_23210	RCFBP_11258	RSP597_05565	RSP795_05600	RSK60v3_900026	RSc2156	RSP799_05715		Hyphotetical protein
RSP673_14575	RSP797_15070	UW163_RS02575	RRSL_03285	CQ06_11665	KR96_18085	RCFBP_21112	RSP597_13770	RSP795_14540	RSK60v3_2040017	RSc0375	RSP799_14285		Hypothetical Protein (diguanylate cyclase)
RSP673_13135	RSP797_13670	UW163_RS01190	RRSL_01586	CQ06_03500	KR96_24355	RCFBP_20851	RSP597_12340	RSP795_13255	RSK60v3_1770002	RSc0613	RSP799_13070		Hypothetical Protein
RSP673_13155	RSP797_13690	UW163_RS01210	RRSL_01582	CQ06_03520	KR96_24335	RCFBP_20855	RSP597_12360	RSP795_13275	RSK60v3_1770006	RSc0609	RSP799_13090		Hypothetical Protein(lipoprotein)
RSP673_09905	RSP797_10030	UW163_RS13130	RRSL_01391	CQ06_05725	KR96_03675	RCFBP_20140	RSP597_09165	RSP795_09120	RSK60v3_1410005	RSc1287	RSP799_10695		Hypothetical Protein
RSP673_10080	RSP797_10205	UW163_RS12955	RRSL_01427	CQ06_00360	KR96_03500	RCFBP_20177	RSP597_09350	RSP795_09295	RSK60v3_1420019	RSc1252	RSP799_10515		Hypothetical Protein
RSP673_09370	RSP797_09265	UW163_RS13635	RRSL_01337	CQ06_07190	KR96_04235	RCFBP_20043	RSP597_08680	RSP795_08645	RSK60v3_1380011	RSc1391	RSP799_11315		Hypothetical protein
RSP673_11075	RSP797_11250	UW163_RS11925	RRSL_01159	CQ06_09340	KR96_02000	RCFBP_20419	RSP597_10370	RSP795_10525	RSK60v3_1530017	RSc1058	RSP799_09510		Hypothetical protein (peptidase)
RSP673_19585	RSP797_20300	UW163_RS21435	RRSL_00331	CQ06_04130	KR96_04830	RCFBP_mp30109	RSP597_22780	RSP795_18390	RSK60v3_mp280001	RSp1273	RSP799_21430		Hypothetical Protein
RSP673_17800	RSP797_12665	UW163_RS22355	RRSL_01820	CQ06_18130	KR96_13785	RCFBP_mp10531	RSP597_18550	RSP795_11925	RSK60v3_mp870009	RSp0508	RSP799_18115		Bacteriophage N4 adsorption protein B
RSP673_08595	RSP797_08535	UW163_RS14355	RRSL_01615	CQ06_13535	KR96_21860	RCFBP_11785	RSP597_07910	RSP795_07885	RSK60v3_1260009	RSc1780	RSP799_08425		Hypothetical protein
RSP673_09705	RSP797_09835	UW163_RS13310	RRSL_00072	CQ06_05530	KR96_03905	RCFBP_20101	RSP597_08975	RSP795_08930	RSK60v3_1400018	RSc1325	RSP799_10940		Hypothetical protein
RSP673_08105	RSP797_08065	UW163_RS14825	RRSL_04553	CQ06_22665	KR96_16000	RCFBP_11637	RSP597_07435	RSP795_07140	RSK60v3_1220007	RSc1629	RSP799_07925		Hypothetical protein
RSP673_23505	RSP797_07120	UW163_RS17040	RRSL_02537	CQ06_07665	KR96_11530	RCFBP_mp30461	RSP597_24320	RSP795_16940	RSK60v3_mp170023	RSp1578	RSP799_22430		Hypothetical protein(arginase)
RSP673_11810	RSP797_11915	UW163_RS16015	RRSL_00209	CQ06_00500	KR96_02665	RCFBP_20570	RSP597_11150	RSP795_11260	RSK60v3_1580089	RSc0911	RSP799_08825		Hypothetical protein (membrane)
RSP673_07915	RSP797_07875	UW163_RS15000	RRSL_04521	CQ06_14225	KR96_20490	RCFBP_11602	RSP597_07250	RSP795_12000	RSK60v3_1180006	RSc1595	RSP799_07735		Hypothetical protein (peptidase)
RSP673_01550	RSP797_01555	UW163_RS06005	RRSL_03154	CQ06_02390	KR96_00280	RCFBP_10350	RSP597_01510	RSP795_01475	RSK60v3_350002	RSc3091	RSP799_01245		Hypothetical protein (outer membrane lipoprotein)
RSP673_01535	RSP797_01540	UW163_RS05990	RRSL_04011	CQ06_13260	KR96_00295	RCFBP_10347	RSP597_01495	RSP795_01460	RSK60v3_340007	RSc3094	RSP799_01230		hypothetical protein
RSP673_20335	RSP797_21225	UW163_RS20690	RRSL_04756	CQ06_20820	KR96_08390	RCFBP_mp20602	RSP597_21945	RSP795_19205	RSK60v3_mp350015	RSp1100	RSP799_20280		Hypothetical Protein
RSP673_20325	RSP797_21215	UW163_RS20700	RRSL_04754	CQ06_20830	KR96_08400	RCFBP_mp20604	RSP597_21955	RSP795_19195	RSK60v3_mp350013	RSp1102	RSP799_20290		Hypothetical Protein (integrase)
RSP673_06960	RSP797_18845	UW163_RS11405	RRSL_00662	CQ06_01980	KR96_14170	RCFBP_11456	RSP597_06650	RSP795_06635	RSK60v3_1000007	RSc1876	RSP799_06935		Hypothetical Protein
RSP673_21380	RSP797_22285	UW163_RS19300	RRSL_00107	CQ06_07020	KR96_15250	RCFBP_mp20246	RSP597_20150	RSP795_20650	RSK60v3_mp640004	RSp0808	RSP799_19025		Hypothetical protein
RSP673_17695	RSP797_20745	UW163_RS22455	RRSL_01800	CQ06_18230	KR96_13675	RCFBP_mp10510	RSP597_18445	RSP795_11830	RSK60v3_mp890011	RSp0486	RSP799_17960		Hypothetical Protein
RSP673_01900	RSP797_01880	UW163_RS06375	RRSL_00873	CQ06_09075	KR96_23550	RCFBP_10419	RSP597_01010	RSP795_01760	RSK60v3_380013	RSc3030	RSP799_01515		Hypothetical protein
RSP673_12720	RSP797_13255	UW163_RS00770	RRSL_04233	CQ06_12070	KR96_06495	RCFBP_20704	RSP597_11880	RSP795_12805	RSK60v3_1720044	RSc0709	RSP799_12480		Lytic transglycosilase
RSP673_06025	RSP797_05940	UW163_RS10505	RRSL_01267	CQ06_03655	KR96_08580	RCFBP_11279	RSP597_05680	RSP795_05705	RSK60v3_920006	RSc2115	RSP799_05820		Hypothetical protein (membrane)
RSP673_14890	RSP797_15355	UW163_RS02860	RRSL_01630	CQ06_08200	KR96_20305	RCFBP_21176	RSP597_14075	RSP795_16320	RSK60v3_2060025	RSc0315	RSP799_14570		Hypothetical protein (exported)
RSP673_23565	RSP797_07055	UW163_RS16975	RRSL_02522	CQ06_07730	KR96_11595	RCFBP_mp30475	RSP597_24370	RSP795_16885	RSK60v3_mp170010	RSp1597	RSP799_22460		Hypothetical (RND transporter)
RSP673_19185	RSP797_19530	UW163_RS21795	RRSL_02096	CQ06_07995	KR96_13380	RCFBP_mp30189	RSP597_23190	RSP795_18020	RSK60v3_mp210010	RSp1416	RSP799_21825		Hypothetical protein (membrane)
RSP673_00140	RSP797_00245	UW163_RS04355	RRSL_04186	CQ06_05250	KR96_17240	RCFBP_10059	RSP597_00155	RSP795_16020	RSK60v3_200004	RSc3405	RSP799_00075		Hypothetical protein (membrane)
